# Supplementary material
Source: Research Square preprint supplement (doi:10.21203/rs.3.rs-9980928/v1)
Supplement: Supplementary file 1 [file 91ff46a07d70c8ca9213dd98.docx]

**Table 1.** The eigen value, percent variance and percent cumulative variance for three principal components (PCs) and factor loading between PCs and traits.

|  | **PC 1** | **PC 2** |
| --- | --- | --- |
| **Eigen value** | 22.38 | 2.25 |
| **% Var. Exp.** | 79.94 | 8.04 |
| **Cum. Var. Exp.** | 79.94 | 87.98 |
| Leaf FW | -0.9749 | -0.0567 |
| Root FW | -0.9881 | -0.046 |
| Leaf DW | -0.948 | -0.1971 |
| Root DW | -0.9845 | 0.0419 |
| RWC | -0.9883 | 0.0151 |
| MSI | -0.9636 | 0.2585 |
| TChl | 0.6905 | 0.1249 |
| Antho | 0.6283 | 0.7204 |
| Leaf PRO | 0.9327 | 0.0027 |
| Root PRO | 0.9824 | 0.0664 |
| Leaf TSS | 0.9125 | 0.144 |
| Root TSS | 0.8969 | -0.2411 |
| Leaf TSP | 0.8706 | -0.4736 |
| Root TSP | 0.9365 | 0.1524 |
| Leaf POD | 0.9964 | 0.018 |
| Root POD | 0.9338 | -0.2541 |
| Leaf CAT | 0.9728 | -0.1028 |
| Root CAT | 0.9228 | 0.1086 |
| Leaf TAC | -0.4712 | 0.8258 |
| Root TAC | 0.972 | -0.0677 |
| Leaf TP | 0.701 | -0.4761 |
| Root TP | 0.8997 | 0.2066 |
| Leaf TF | 0.7236 | 0.3859 |
| Root TF | 0.6699 | -0.1194 |
| Leaf TT | 0.9935 | 0.1053 |
| Root TT | 0.9179 | 0.1358 |
| Leaf SAP | -0.9132 | 0.029 |
| Root SAP | 0.9689 | 0.1918 |

**Table 2.** Correlation matrix values for all the analyzed parameters.

|  | **Leaf FW** | **Root FW** | **Leaf DW** | **Root DW** | **RWC** | **MSI** | **TChl** | **Antho** | **Leaf PRO** | **Root PRO** | **Leaf TSS** | **Root TSS** | **Leaf TSP** | **Root TSP** | **Leaf POD** | **Root POD** | **Leaf CAT** | **Root CAT** | **Leaf TAC** | **Root TAC** | **Leaf TP** | **Root TP** | **Leaf TF** | **Root TF** | **Leaf TT** | **Root TT** | **Leaf SAP** | **Root SAP** |
| --- | --- | --- | --- | --- | --- | --- | --- | --- | --- | --- | --- | --- | --- | --- | --- | --- | --- | --- | --- | --- | --- | --- | --- | --- | --- | --- | --- | --- |
| **Leaf FW** | 1 | 0.996 | 0.982 | 0.987 | 0.989 | 0.923 | -0.609 | -0.673 | -0.906 | -0.999 | -0.93 | -0.803 | -0.799 | -0.955 | -0.956 | -0.881 | -0.951 | -0.923 | 0.432 | -0.91 | -0.71 | -0.925 | -0.625 | -0.495 | -0.983 | -0.874 | 0.901 | -0.939 |
| **Root FW** | 0.996 | 1 | 0.98 | 0.991 | 0.992 | 0.942 | -0.613 | -0.656 | -0.912 | -0.998 | -0.934 | -0.842 | -0.826 | -0.966 | -0.975 | -0.907 | -0.965 | -0.944 | 0.437 | -0.932 | -0.685 | -0.933 | -0.656 | -0.557 | -0.992 | -0.885 | 0.908 | -0.963 |
| **Leaf DW** | 0.982 | 0.98 | 1 | 0.966 | 0.952 | 0.861 | -0.574 | -0.758 | -0.839 | -0.984 | -0.962 | -0.749 | -0.709 | -0.962 | -0.93 | -0.808 | -0.933 | -0.925 | 0.325 | -0.878 | -0.614 | -0.925 | -0.661 | -0.437 | -0.971 | -0.879 | 0.834 | -0.95 |
| **Root DW** | 0.987 | 0.991 | 0.966 | 1 | 0.982 | 0.956 | -0.633 | -0.615 | -0.881 | -0.99 | -0.939 | -0.849 | -0.859 | -0.931 | -0.969 | -0.901 | -0.988 | -0.906 | 0.538 | -0.949 | -0.759 | -0.88 | -0.648 | -0.55 | -0.98 | -0.904 | 0.869 | -0.937 |
| **RWC** | 0.989 | 0.992 | 0.952 | 0.982 | 1 | 0.958 | -0.64 | -0.611 | -0.95 | -0.99 | -0.892 | -0.858 | -0.857 | -0.945 | -0.976 | -0.935 | -0.951 | -0.926 | 0.466 | -0.934 | -0.721 | -0.923 | -0.637 | -0.593 | -0.985 | -0.87 | 0.944 | -0.943 |
| **MSI** | 0.923 | 0.942 | 0.861 | 0.956 | 0.958 | 1 | -0.6 | -0.401 | -0.904 | -0.928 | -0.832 | -0.932 | -0.967 | -0.879 | -0.957 | -0.98 | -0.96 | -0.883 | 0.652 | -0.947 | -0.767 | -0.834 | -0.582 | -0.688 | -0.929 | -0.83 | 0.902 | -0.892 |
| **TChl** | -0.609 | -0.613 | -0.574 | -0.633 | -0.64 | -0.6 | 1 | 0.65 | 0.686 | 0.626 | 0.562 | 0.589 | 0.538 | 0.443 | 0.713 | 0.539 | 0.639 | 0.401 | -0.276 | 0.788 | 0.629 | 0.408 | 0.876 | 0.684 | 0.692 | 0.862 | -0.556 | 0.634 |
| **Antho** | -0.673 | -0.656 | -0.758 | -0.615 | -0.611 | -0.401 | 0.65 | 1 | 0.556 | 0.682 | 0.715 | 0.329 | 0.176 | 0.64 | 0.629 | 0.336 | 0.563 | 0.569 | 0.225 | 0.588 | 0.249 | 0.634 | 0.774 | 0.246 | 0.707 | 0.756 | -0.489 | 0.71 |
| **Leaf PRO** | -0.906 | -0.912 | -0.839 | -0.881 | -0.95 | -0.904 | 0.686 | 0.556 | 1 | 0.907 | 0.741 | 0.845 | 0.819 | 0.869 | 0.934 | 0.929 | 0.834 | 0.864 | -0.349 | 0.88 | 0.63 | 0.887 | 0.643 | 0.704 | 0.924 | 0.793 | -0.986 | 0.889 |
| **Root PRO** | -0.999 | -0.998 | -0.984 | -0.99 | -0.99 | -0.928 | 0.626 | 0.682 | 0.907 | 1 | 0.936 | 0.818 | 0.805 | 0.958 | 0.966 | 0.886 | 0.959 | 0.929 | -0.427 | 0.924 | 0.7 | 0.925 | 0.655 | 0.525 | 0.99 | 0.89 | -0.899 | 0.953 |
| **Leaf TSS** | -0.93 | -0.934 | -0.962 | -0.939 | -0.892 | -0.832 | 0.562 | 0.715 | 0.741 | 0.936 | 1 | 0.772 | 0.7 | 0.903 | 0.893 | 0.755 | 0.934 | 0.866 | -0.394 | 0.868 | 0.621 | 0.836 | 0.668 | 0.421 | 0.927 | 0.884 | -0.728 | 0.911 |
| **Root TSS** | -0.803 | -0.842 | -0.749 | -0.849 | -0.858 | -0.932 | 0.589 | 0.329 | 0.845 | 0.818 | 0.772 | 1 | 0.927 | 0.8 | 0.907 | 0.939 | 0.876 | 0.827 | -0.569 | 0.9 | 0.612 | 0.759 | 0.634 | 0.811 | 0.851 | 0.777 | -0.837 | 0.856 |
| **Leaf TSP** | -0.799 | -0.826 | -0.709 | -0.859 | -0.857 | -0.967 | 0.538 | 0.176 | 0.819 | 0.805 | 0.7 | 0.927 | 1 | 0.745 | 0.869 | 0.956 | 0.888 | 0.768 | -0.776 | 0.887 | 0.776 | 0.691 | 0.478 | 0.723 | 0.811 | 0.727 | -0.818 | 0.769 |
| **Root TSP** | -0.955 | -0.966 | -0.962 | -0.931 | -0.945 | -0.879 | 0.443 | 0.64 | 0.869 | 0.958 | 0.903 | 0.8 | 0.745 | 1 | 0.926 | 0.874 | 0.897 | 0.992 | -0.283 | 0.841 | 0.494 | 0.986 | 0.583 | 0.506 | 0.95 | 0.779 | -0.897 | 0.961 |
| **Leaf POD** | -0.956 | -0.975 | -0.93 | -0.969 | -0.976 | -0.957 | 0.713 | 0.629 | 0.934 | 0.966 | 0.893 | 0.907 | 0.869 | 0.926 | 1 | 0.934 | 0.963 | 0.918 | -0.444 | 0.979 | 0.667 | 0.891 | 0.763 | 0.724 | 0.989 | 0.924 | -0.909 | 0.976 |
| **Root POD** | -0.881 | -0.907 | -0.808 | -0.901 | -0.935 | -0.98 | 0.539 | 0.336 | 0.929 | 0.886 | 0.755 | 0.939 | 0.956 | 0.874 | 0.934 | 1 | 0.896 | 0.896 | -0.574 | 0.9 | 0.667 | 0.856 | 0.54 | 0.74 | 0.896 | 0.749 | -0.943 | 0.877 |
| **Leaf CAT** | -0.951 | -0.965 | -0.933 | -0.988 | -0.951 | -0.96 | 0.639 | 0.563 | 0.834 | 0.959 | 0.934 | 0.876 | 0.888 | 0.897 | 0.963 | 0.896 | 1 | 0.881 | -0.599 | 0.967 | 0.76 | 0.826 | 0.675 | 0.6 | 0.959 | 0.917 | -0.815 | 0.927 |
| **Root CAT** | -0.923 | -0.944 | -0.925 | -0.906 | -0.926 | -0.883 | 0.401 | 0.569 | 0.864 | 0.929 | 0.866 | 0.827 | 0.768 | 0.992 | 0.918 | 0.896 | 0.881 | 1 | -0.288 | 0.83 | 0.446 | 0.982 | 0.565 | 0.56 | 0.928 | 0.743 | -0.9 | 0.955 |
| **Leaf TAC** | 0.432 | 0.437 | 0.325 | 0.538 | 0.466 | 0.652 | -0.276 | 0.225 | -0.349 | -0.427 | -0.394 | -0.569 | -0.776 | -0.283 | -0.444 | -0.574 | -0.599 | -0.288 | 1 | -0.542 | -0.838 | -0.18 | -0.058 | -0.303 | -0.388 | -0.404 | 0.344 | -0.281 |
| **Root TAC** | -0.91 | -0.932 | -0.878 | -0.949 | -0.934 | -0.947 | 0.788 | 0.588 | 0.88 | 0.924 | 0.868 | 0.9 | 0.887 | 0.841 | 0.979 | 0.9 | 0.967 | 0.83 | -0.542 | 1 | 0.739 | 0.782 | 0.801 | 0.755 | 0.955 | 0.958 | -0.831 | 0.929 |
| **Leaf TP** | -0.71 | -0.685 | -0.614 | -0.759 | -0.721 | -0.767 | 0.629 | 0.249 | 0.63 | 0.7 | 0.621 | 0.612 | 0.776 | 0.494 | 0.667 | 0.667 | 0.76 | 0.446 | -0.838 | 0.739 | 1 | 0.418 | 0.347 | 0.331 | 0.661 | 0.694 | -0.582 | 0.512 |
| **Root TP** | -0.925 | -0.933 | -0.925 | -0.88 | -0.923 | -0.834 | 0.408 | 0.634 | 0.887 | 0.925 | 0.836 | 0.759 | 0.691 | 0.986 | 0.891 | 0.856 | 0.826 | 0.982 | -0.18 | 0.782 | 0.418 | 1 | 0.543 | 0.495 | 0.918 | 0.712 | -0.923 | 0.933 |
| **Leaf TF** | -0.625 | -0.656 | -0.661 | -0.648 | -0.637 | -0.582 | 0.876 | 0.774 | 0.643 | 0.655 | 0.668 | 0.634 | 0.478 | 0.583 | 0.763 | 0.54 | 0.675 | 0.565 | -0.058 | 0.801 | 0.347 | 0.543 | 1 | 0.749 | 0.745 | 0.888 | -0.538 | 0.78 |
| **Root TF** | -0.495 | -0.557 | -0.437 | -0.55 | -0.593 | -0.688 | 0.684 | 0.246 | 0.704 | 0.525 | 0.421 | 0.811 | 0.723 | 0.506 | 0.724 | 0.74 | 0.6 | 0.56 | -0.303 | 0.755 | 0.331 | 0.495 | 0.749 | 1 | 0.625 | 0.652 | -0.649 | 0.675 |
| **Leaf TT** | -0.983 | -0.992 | -0.971 | -0.98 | -0.985 | -0.929 | 0.692 | 0.707 | 0.924 | 0.99 | 0.927 | 0.851 | 0.811 | 0.95 | 0.989 | 0.896 | 0.959 | 0.928 | -0.388 | 0.955 | 0.661 | 0.918 | 0.745 | 0.625 | 1 | 0.925 | -0.903 | 0.979 |
| **Root TT** | -0.874 | -0.885 | -0.879 | -0.904 | -0.87 | -0.83 | 0.862 | 0.756 | 0.793 | 0.89 | 0.884 | 0.777 | 0.727 | 0.779 | 0.924 | 0.749 | 0.917 | 0.743 | -0.404 | 0.958 | 0.694 | 0.712 | 0.888 | 0.652 | 0.925 | 1 | -0.716 | 0.896 |
| **Leaf SAP** | 0.901 | 0.908 | 0.834 | 0.869 | 0.944 | 0.902 | -0.556 | -0.489 | -0.986 | -0.899 | -0.728 | -0.837 | -0.818 | -0.897 | -0.909 | -0.943 | -0.815 | -0.9 | 0.344 | -0.831 | -0.582 | -0.923 | -0.538 | -0.649 | -0.903 | -0.716 | 1 | -0.876 |
| **Root SAP** | -0.939 | -0.963 | -0.95 | -0.937 | -0.943 | -0.892 | 0.634 | 0.71 | 0.889 | 0.953 | 0.911 | 0.856 | 0.769 | 0.961 | 0.976 | 0.877 | 0.927 | 0.955 | -0.281 | 0.929 | 0.512 | 0.933 | 0.78 | 0.675 | 0.979 | 0.896 | -0.876 | 1 |
